1           **Reconstruction of a generic genome-scale metabolic**  
2           **network for chicken: investigating network connectivity**  
3                           **and finding potential biomarkers**

4   Ehsan Salehabadi<sup>1</sup>, Ehsan Motamedian<sup>1</sup>, Seyed Abbas Shojaosadati<sup>1,\*</sup>

5   <sup>1</sup>Biotechnology Group, Department of Chemical Engineering, Tarbiat Modares University,  
6   Tehran, Iran

7   **Correspondence:** Seyed Abbas Shojaosadati, Department of Biotechnology, Faculty of  
8   Chemical Engineering, Tarbiat Modares University, P.O. Box 14115-143, Tehran, Iran.

9   **E-mail:** [shoja\\_sa@modares.ac.ir](mailto:shoja_sa@modares.ac.ir)

10

## 11 **Abstract**

12 Chicken is the first sequenced avian that has a crucial role in human life for its meat and  
13 egg production. Because of various metabolic disorders, study the metabolism of chicken cell  
14 is important. Herein, the first genome-scale metabolic model of a chicken cell named iES1300,  
15 consists of 2427 reactions, 2569 metabolites, and 1300 genes, was reconstructed manually  
16 based on databases. Interactions of metabolic genes for growth were examined for *E. coli*, *S.*  
17 *cerevisiae*, human, and chicken metabolic models. The results indicated robustness to genetic  
18 manipulation for iES1300 similar to the results for human. iES1300 was integrated with  
19 transcriptomics data using algorithms and Principal Component Analysis was applied to  
20 compare context-specific models of the normal, tumor, lean and fat cell lines. It was found that  
21 the normal model has notable metabolic flexibility in the utilization of various metabolic  
22 pathways, especially in metabolic pathways of the carbohydrate metabolism, compared to the  
23 others. It was also concluded that the fat and tumor models have similar growth metabolisms  
24 and the lean chicken model has a more active lipid and carbohydrate metabolism.

25 **Keywords:** Genome-scale metabolic model, Chicken cell, Flux balance analysis,  
26 Transcriptomics data integration, Single and double gene deletion analyses, PCA

27

## 28 **1. Introduction**

29 Metabolism is an important cellular process in a living cell. Thus, a deep understanding of  
30 metabolic networks is required [1]. Collected biological data about metabolic pathways has led  
31 us to reconstruct a genome-scale metabolic network that can be mathematically represented  
32 [2]. Constraint-based metabolic models are known to be structured models that consider a cell  
33 a multi-component system and contain detailed intracellular process information; while  
34 because of the black box nature of the models for many cases of unsupervised learning methods  
35 in deep-learning, further processing may be required to interpret the biological meaning of the  
36 model [3]. Therefore, metabolic models will be able to predict the conditions imposed on the  
37 cell more reliably [4]. This approach will bring the model prediction as close to reality as  
38 possible by considering constraints on the upper bounds of the metabolic reaction fluxes [5].  
39 Besides, metabolic models gain higher predictive power by integration with omics data, which  
40 in this respect, their prediction will be more valid than other data-driven models [6]. In recent  
41 years, genome-scale metabolic models (GEMs) have been increasingly developed due to the  
42 advances in genome sequencing and annotation techniques [7,8]. GEMs build a bridge between  
43 genotypic data and phenotypic traits [9].

44 The importance of GEMs was strengthened when it was reported that manually and automated  
45 metabolic models have been submitted for more than 6200 organisms worldwide. More than  
46 200 of these models belong to eukaryotes [10]. Following the reconstruction of the  
47 *saccharomyces cerevisiae* GEM in 2003 as the first eukaryotic model [11], the reconstruction  
48 of eukaryotic models became prevalent so that in 2007, the first human GEM RECON1 was  
49 reconstructed [2], and human GEMs continued to be updated with the expansion of the network  
50 [12], improvement of lipid metabolism [13], energy metabolism [14], and structural  
51 information [15]. Other studies in this area include mouse model reconstruction, which is

52 known as the first attempt to reconstruct a mammalian model based on genomic data [16]. The  
53 mouse model was also updated in subsequent years using a human model [17]. Chinese  
54 Hamster Ovary (CHO) cells are the other interesting eukaryotic models that have been recently  
55 reconstructed because of their extensive applications in the biopharmaceutical industries  
56 [18,19]. While metabolic networks has been reconstructed for most of the important  
57 mammals in the human life, no attempt has been yet made to reconstruct a metabolic  
58 network for chickens as an important source of food. Chickens are important eukaryotes  
59 because of their large population in animal husbandries and rural life as well as the annually  
60 high consumption of their egg and meat [20]. Studies on chicken first began in 1628 with an  
61 investigation on the functions of its arteries and veins. Then, chicken genetic research improved  
62 when the chicken's first genetic map was constructed in 1936 [21]. Finally, in 2004, the genome  
63 sequencing of chicken wherein scientists had estimated 20000 to 23000 genes for chicken was  
64 released [22]. Since the last decades, genetic engineering has greatly improved, especially in  
65 the field of chickens growth and feed efficiency [23]; however, these genetic improvements  
66 have led to intensifying metabolic disorders [23]. In chickens, there are various metabolic  
67 disorders including those with environmental origins, such as oxygen or light regime, feeding  
68 strategy, as well as growth-related causes such as extraordinary growth. Some of these common  
69 disorders are fatal [24]. Thus, the development of a comprehensive metabolic model can be a  
70 platform to study the metabolism of chicken. Furthermore, such model can guide us to the  
71 treatment and even prevention of various diseases in the chicken.

72 In this study, for the first time, a comprehensive genome-scale metabolic reconstruction for a  
73 chicken cell (named iES1300) was reconstructed. Flux balance analysis (FBA) [25], and single  
74 gene deletion as well as double gene deletion analyses were applied to compare robustness of  
75 iES1300 and three other important models for growth. Furthermore, transcriptomics data were  
76 integrated with iES1300 to construct four types of chicken cell lines, including fat, lean,

77 normal, and tumor. The models were compared to determine essential metabolic differences  
78 for growth.

## 79 **2. Material and Methods**

### 80 **2.1 The procedure of genome-scale model reconstruction for *gallus***

#### 81 *gallus*

82

83 **Fig 1.** Schematic representation of (a) step-by-step genome-scale metabolic reconstruction and (b)  
84 using transcriptomics data extracted by online gene expression databases (c) to achieve context-  
85 specific models by the integration algorithms.

86

87 Fig 1 illustrates the overall procedure of iES1300 reconstruction and building specific  
88 models. Using the annotation of genome sequencing for *Gallus gallus* [22], a draft model was  
89 generated based on the reconstruction protocol [26]. For this purpose, we applied the KEGG  
90 database [27] and a pathway-by-pathway analysis of *Gallus gallus* metabolism. The draft  
91 consists of all metabolic reactions and their corresponding genes, enzymes, and metabolites  
92 collected from the KEGG, BiGG [28] and CHEBI [29] databases. Reaction and metabolite  
93 abbreviations were also extracted from BiGG. If there were not any reactions or metabolite  
94 names, we added new names. Mass and charge balance as well as the reversibility of each  
95 reaction were also performed. based on the literature, the intracellular pH of 7.2 was considered  
96 for charge balance [30]. Moreover, gene-to-reaction association information was extracted  
97 from the related literature and gene orthology was obtained from close organisms. Subcellular  
98 location information was taken from UNIPROT [31]. Information from CELLO [32] and  
99 EukmPLoc v2.0 [33] was also used for the prediction of cellular location when the localization  
100 information was not available in UNIPROT. These two databases use the amino acid sequence

101 of the expressed protein in the FASTA format. CELLO can also use gene nucleotide sequences  
102 to predict the location of metabolic reactions. To find transport reactions, information from the  
103 REACTOME database was used [34]. Further, regarding lack of data for growth-associated  
104 maintenance (GAM) and some of the metabolites related to glycogen and lipid contents that  
105 appeared in the biomass formation reaction, these data were selected from the CHO model  
106 [18]. Furthermore, the amount of non-growth associated maintenance (NGAM) was taken from  
107 a mouse cell [35]. Also, for the biomass reaction generation, the existing information for  
108 chicken, including amino acid percentage and DNA components percentage was used. In  
109 addition, amino acid coefficients information was taken from the High-performance Integrated  
110 Virtual Environment (HIVE) database [36] and nucleotide information of the chicken genome  
111 data in NCBI [37]. More details about biomass reaction are available in the S2 file. The gap-  
112 filling process was also established so that the added reactions made the model capable of  
113 growing.

114

## 115 **2.2 *In silico* simulations condition**

116 To solve linear programming problems, COBRA toolbox in MATLAB 2017b software and  
117 the glpk solver package were utilized [38]. For intracellular reversible reactions, lower and  
118 upper bounds were set at  $-1000$  and  $1000 \frac{mmol}{gDCW.h}$ , respectively. Contrarily, for intracellular  
119 irreversible reactions, lower and upper bounds were set at  $0$  and  $1000 \frac{mmol}{gDCW.h}$ , respectively. The  
120 upper bound of all the exchange reactions was set at  $1000 \frac{mmol}{gDCW.h}$ . An RPMI-like culture  
121 medium was also selected for the simulation of the medium, and the lower bounds of exchange  
122 reactions were fixed based on [39]. Detailed components of the RPMI-like culture medium are

123 represented in the S2 file. Besides, the biomass reaction was selected as the objective function  
124 in all of the simulations.

## 125 **2.3 Comparison of the network**

126 To date, a large number of studies have used different methods of network topology analysis  
127 to evaluate metabolic networks in terms of phylogenetic relationships[40]. Therefore, this  
128 analysis of iES1300 to see how phylogenetically close it is to its peers was applied. We  
129 performed the single- and double-gene deletion analyses to compare iES1300 with the  
130 metabolic models of human (RECON1) [2], *Saccharomyces cerevisiae* (iMM904) [41], and  
131 *Escherichia coli* (iJO1366) [42] to evaluate all metabolic networks in terms of phylogenetic  
132 relationships[40]. These analyses indicated that iES1300 was more flexible and robust  
133 compared to other prokaryotic and eukaryotic models. GR ratio (predicted growth rate after  
134 gene deletion per growth rate for wild type) was also applied to indicate the efficacy of single-  
135 or double-gene deletion. According to the method presented by [43], we determined sick and  
136 lethal genes based on the single-gene deletion analysis, while the interactions of genes,  
137 synthetic lethal, and synthetic sick genes were specified based on the double-gene deletion  
138 analysis. Finally, to compare the four models, the results of the single-gene deletions and the  
139 number of interactions were normalized by dividing the number of genes in each model,  
140 whereas the results of the double-gene deletions were divided by the square of the number of  
141 genes in each model.

## 142 **2.4 Integration of gene expression data**

143 Considering HCC as an important disorder in the chickens liver [44], and the negative  
144 effects of adiposity on the economics of the poultry industries, especially in the case of meat  
145 quality [45], gene expression data from four species of chicken, including chicken liver control

146 samples of hepatocellular carcinoma [46] , normal cell lines [47], and adipose tissue samples  
147 of lean and fat [48] were taken from ArrayExpress [49]. In our previous research[50], we  
148 indicated that TRFBA[51] and GIMME[52] are successful algorithms, especially for prediction  
149 of growth. So, both algorithms were applied to generate high-quality context-specific models.  
150 First, GIMME was used to remove reactions supported by genes with low expression levels.  
151 Then, TRFBA was employed to constrain the upper bound of the remaining reactions in the  
152 model according to the expression level of their supporting genes. In fact, TRFBA first  
153 converted all of the reversible reactions of a metabolic model into irreversible and  
154 “withoutOR”. Next, it added a set of constraints to limit the rate of reactions [51] as follows:

$$155 \quad \sum_{i \in K_j} v_i \leq E_j \times C \quad (1)$$

156 Where  $v_i$  is the reaction flux of  $i$ ,  $E_j$  is the expression of the gene  $j$ ,  $K_j$  is the set of indices of  
157 reactions supported by metabolic gene  $j$ , and  $C$  is a constant parameter that converts the  
158 expression levels to the upper bounds of the model reactions. This coefficient indicates the  
159 maximum rate supported by one unit of expression level of a gene; thus, the unit for  $C$  is  $\text{mmol}$   
160  $\text{gDCW}^{-1} \text{h}^{-1}$ .

161 A threshold of 0.25 and cutoff of 0.9 were also used for GIMME, and the parameter of TRFBA  
162 ( $C$ ) for each cell line was changed in a stepwise approach according to the method presented  
163 in the next section.

164

## 165 **2.5 Differentiation of cell lines using principal component analysis**

166 After applying GIMME, the stepwise TRFBA was employed by stepwise change in  $C$   
167 similar to the method presented by [50].  $C$  was changed from zero to  $C_{\text{brk}}$  with a step size of  
168 0.1 of  $C_{\text{brk}}$ , hence, nine flux distributions were constructed for each cell line.  $C_{\text{brk}}$  is the point  
169 at which the growth rate does not change with an increase in the value of  $C$  [50]. In fact, TRFBA  
170 was used to maximize the growth rate for each cell. On the other hand, to avoid the well-known



171 degeneracy of solutions, the Manhattan norm of the flux distribution was minimized while the  
172 optimal growth rate was given as constraint [53]. Correlated reactions with growth were  
173 determined for each cell line by calculating the Pearson correlation coefficient between each  
174 reaction flux and growth rate so that reactions with a coefficient more than 0.9 ( $P\text{-value} \leq 0.05$ )  
175 were considered correlated. In the next step, the common growth-correlated reactions for the  
176 four cell lines were selected, and PCA was performed to differentiate the cell lines using the  
177 selected reactions.

## 178 **3. Results and Discussions**

### 179 **3.1 Characteristics of the reconstructed model**

180 The reconstructed model contained 2427 biochemical reactions from 95 metabolic  
181 subsystems, 1300 genes, and 2569 metabolites. Of these reactions, 1910 reactions were gene-  
182 associated reactions and 295 of them were non-gene-associated. The remaining reactions were  
183 pseudo reactions, which were mostly the exchange reactions. During the gap-filling process,  
184 67 reactions were added to the model to make it capable of growing. Fig 2a categorizes the  
185 reactions of iES1300 into nine main subsystems. As shown in this figure, among these  
186 subsystems, lipid and energy metabolism have the largest and the smallest distributions,  
187 respectively. Fig 2b, on the other side, determines that iES1300 consists of 10 subcellular  
188 locations, named cytosol, mitochondrion, extracellular space, endoplasmic reticulum, Golgi  
189 apparatus, lysosome, peroxisome, cytosolic membrane, endosome, and nucleus. This figure  
190 also shows that cytosol has the largest metabolite distribution. In Fig 2c, we can see similar as  
191 well as different reactions of iES1300 that compared with the two important mammalian  
192 metabolic GEMs. Fig 2c indicates that iES1300 has a relatively high similarity with the  
193 Recon2v4 and iCHOv1 networks. The new reactions of iES1300 may refer to the HMR  
194 reactions existing in the Recon3D reaction list used in iES1300, spontaneous reactions and also

195 the reactions with different subcellular locations. Moreover, comparison of gene-associated  
196 reactions of iES1300 with three GEMs (Fig 2d) indicated that iES1300 had a lower ratio of  
197 non-gene-associated reactions to the total number of reactions of each model. Pseudo reactions  
198 are also referred to the exchange, demand, sink, biomass, and ATP maintenance reactions.

199

200 **Fig 2. Characteristics of the Reconstructed Model.** (a) In iES1300, there are 9 main metabolism  
201 categories of which the lipid metabolism is responsible for the largest reaction distribution. (b)  
202 Cytosol is considered to have the largest metabolite distribution. (c) Investigating the number of  
203 reactions shared by three important mammalian models. The newly added reactions in iES1300 in  
204 comparison to the two other models can be discovered. (d) Examination of the gene-to-reaction  
205 association's ratios (To the total number of reactions of each model) in the four important mammalian  
206 models exhibits that iES1300 has much lower orphan reactions compared to the other models.

207

### 208 **3.2 Comparison of iES1300 with the other eukaryotic and** 209 **prokaryotic models**

210 Three different types of organism cells were chosen to be compared with iES1300 using the  
211 single- and double-gene deletion analyses. Table 1 presents that the effect of single- and  
212 double-gene deletions on growth of multicellular organisms are much lower than those of  
213 unicellular organisms. The lower GR ratio of genes with interactions in two multicellular  
214 species also showed that compared with unicellular models, multicellular ones had more  
215 robustness and flexibility to genetic perturbations. In addition, the analyses confirmed that the  
216 trait of iES1300 was similar to the eukaryotic models.

217

218

219 **Table 1. Results of single and double gene deletion analysis on four metabolic models using FBA**  
220 **approach**

| Cell lines | Number of Genes | Ratios               |                             |                        |
|------------|-----------------|----------------------|-----------------------------|------------------------|
|            |                 | Growth-Related Genes | Growth-Related Double-Genes | Genes with Interaction |
| iES1300    | 1300            | 0.05                 | 0.0007                      | 0.09                   |
| RECON1     | 1905            | 0.056                | 0.0002                      | 0.07                   |
| iMM904     | 905             | 0.16                 | 0.0014                      | 0.016                  |
| iJO1366    | 1367            | 0.21                 | 0.0013                      | 0.15                   |

221

222

### 223 **3.3 Evaluation of metabolic similarities for cell lines**

224 Growth vs.  $C/C_{brk}$  for each model is presented in Fig 3. In this figure, we can see that the  
225 growth patterns of fat and tumor cell models are nearly analogous. In addition, metabolisms of  
226 lean model is more susceptible to the change of  $C$  compared to normal.

227

228 **Fig 3.** The different patterns of the growth sensitivity to the normalized parameter of TRFBA  
229 algorithm ( $C/C_{brk}$ ), are a source for differentiation of the four models.

230

231 Furthermore, by applying PCA for the common growth-related reactions, it was found that the  
232 normal and lean models were significantly different from tumor and fat models (Fig 4a). The  
233 PCA results also indicated that the normal chicken cell was the most different cell line from  
234 the other cell lines. Fig 4b illustrates that by using the first principal component, 85% of the  
235 difference between normal cell metabolism and other cell lines can be explained. We further  
236 presented the difference of lean chicken cell with other cell lines by the second principal

237 component with approximately 15% variance. It can be seen in Fig 4a that the fat model has  
238 metabolic similarities to tumor model. Therefore, we can state that the normal model had key  
239 metabolic differences from lean, fat, and tumor chick cell metabolisms. Focusing on these  
240 differences and targeting them can prevent such metabolic disorders in chickens. Results of  
241 PCA also verified that a considerable number of reactions that shifted along the PC2 were  
242 orthogonal to the reactions that appear in PC1, indicating that the lean and the normal models  
243 have presumably separate growth mechanisms.

244

245 **Fig 4. PCA for extracting the reactions that play the role of biomarkers.** (a) PCA shows that the  
246 36 flux distributions created by the combination of two integration algorithms, GIMME[52], and  
247 stepwise TRFBA[51] are successfully categorized into four different groups so that each group  
248 belongs to one cell line. (b) The variance explanation chart indicates that the 1<sup>st</sup> principal component  
249 is responsible for about 85% of the variance. The other 15% can be explained by the 2<sup>nd</sup> principal  
250 component. (c) The main differentiated reactions in PCA. 28 reactions are shown to have participated  
251 in the differentiation of the fat, lean, normal and tumor cells. Other reactions with lower absolute PC  
252 values were not investigated. The complete list of the reaction names is available in the S2 file.

253

254 Fig 4c also shows the 28 main reactions in the differentiation of fat, lean, tumor, and normal  
255 chicken cell lines. Reactions with low values of absolute principal components were not  
256 considered because their differentiated flux distributions were insignificant.

257 Besides, it is worth mentioning that the fat and tumor chicken models had strong resemblances,  
258 mostly because of their glucose, nucleotide, and lipid metabolism activities and many essential  
259 amino acid exchange reactions of these two models. These results are presented in the S2 file,  
260 where all the differentiated reactions in PCA are explained. Research works, especially in the  
261 field of obesity and Hepatocellular Carcinoma (HCC), indicated that in obesity, fat  
262 accumulation leads to liver malfunction, and consequently the liver cannot send out more  
263 triglycerides by very-low-density lipoprotein (VLDL) than that are synthesized. This

264 intrahepatic triglyceride increasing would, in turn, result in fatty liver, and consequently liver  
265 failure and HCC [54,55]. In the case of iES1300, lots of relationships and similarities were  
266 observed, especially in three pathways of lipid metabolism, including Fatty Acid Synthesis  
267 (FAS), sphingolipid, and glycerophospholipid Metabolisms. Similarities in the flux patterns of  
268 FAS could lead both tumor and fat models to equally produce Palmitoyl-CoA, which is a key  
269 metabolite in the progression of many other lipid pathways. Sphingolipid metabolism is one of  
270 the metabolic pathways, which is affected by FAS. This metabolic pathway is known for  
271 having some bioactive metabolites involved in the regulation of cell growth [56]. Therefore, it  
272 can be one of the primary sources of similarity in both models. Tracking sphingolipid and  
273 glycerophospholipid metabolisms has also revealed that some of their major metabolites play  
274 a key role in the biomass objective function reaction. Given that the nucleotides are widely  
275 used in various functions of all cells, and because of their relation with cell proliferation to  
276 DNA replication and RNA production [57], the more balance in the nucleotide metabolism  
277 activity could result in more equivalency of nucleotide production used for biomass generation.  
278 Moreover, it has been proved that obesity can systemically impact glucose metabolism by  
279 elevating glucose and insulin level, which favors cancer cell progression [58]. It can be  
280 presumed that the similarity in these three main metabolisms (glucose, nucleotide, and lipid  
281 metabolisms) controlling cell growth and proliferation affects the similarity between the  
282 amounts of many biomass reactants produced in tumor and fat models. This similarity could  
283 lead to the identical cell growth patterns in the tumor and fat models rather than the normal and  
284 lean models.

285 PCA revealed that in the 1<sup>st</sup> Principal Component, which differentiated the normal chicken  
286 model from other models, especially tumor model, there were numerous distinguished  
287 reactions in three metabolisms, including nucleotide, carbohydrate, and lipid metabolism.  
288 Although number of these reactions were higher in the tumor cell metabolism than in the

289 normal cells, the results demonstrated that glycolysis and pentose phosphate pathways were  
290 the most critical metabolic pathways in diversities of normal and tumor chicken models. It is  
291 also noteworthy that PC1 results of the 28 leading differentiated reactions indicated that the  
292 glycolysis pathway in tumor cell metabolism had higher activity toward the production of 3-  
293 phosphoglycerate, which is a key metabolite in the development of glycine, serine, and  
294 threonine metabolism. On this account, the tumor cells are expected to be more active than a  
295 normal cell in this metabolic pathway. This assertion could be justified by knowing that serine  
296 and glycine provide the main precursors for tumor cell metabolism [59]. It has been also  
297 observed that despite the fact that most reactions happen in the tumor cell, the normal cell could  
298 produce significant amounts of ribose-5-phosphate. Further investigations have shown that in  
299 the next step, this metabolite is converted to 5-phospho-ribose 1-diphosphate, which plays an  
300 influential role in the progression of nucleotide metabolism. It is important to note that  
301 nucleotides can be synthesizable from two main metabolisms of *de novo* synthesis and salvage  
302 pathways [57]. The proliferating cells such as cancer cells are more eager to synthesize their  
303 required nucleotides through *de novo* synthesis [60]. Similarly, in the present study, iES1300  
304 demonstrated that the preference of normal chicken cell to use recycling of its nucleosides and  
305 nucleobases through salvage pathways is much higher than tumor cell.

306 On the other side, for the 2<sup>nd</sup> Principal Component, which differentiated the lean cell line model  
307 from the others, especially fat model metabolism, various differentially flux distributions were  
308 observed. Results illustrated that in many metabolisms, because of several positive shifts along  
309 the PC2 axis, the metabolic activity of lean chicken can be more than that of fat chicken.  
310 However, a few of them were identified to be significant. Intriguingly, we perceived that the  
311 activity of enzyme phosphoglucomutase in the production of glucose-6-phosphate and the way  
312 it is used can be the dominant source of differences between lean and fat models. In the lean  
313 model, a considerable amount of glucose-6-phosphate heads towards inositol phosphate as well

314 as ascorbate and aldarate metabolisms to produce significant amounts of uridine diphosphate  
315 glucose (UDPG). Since UDPG is a key precursor in starch and sucrose metabolism, it was  
316 expected that the lean model had much more activity on this pathway. Additional investigations  
317 indicated that the increase in activity of lean model was not due to glycogen production and  
318 storage, but it resulted from the production of glucose by 4-alpha-glucanotransferase. As a  
319 result, the starch and sucrose metabolism was considered a key metabolic pathway, and the  
320 principal source of cell metabolism for glucose generation and utilization. Glucose is consumed  
321 in the lean model at a significantly higher rate, even in adipose tissue. Previous studies on the  
322 relationship between glycogen and lipid oxidation in the liver and muscles have also shown  
323 that the glycogen storage reduction could increase lipid oxidation by stimulation of cellular  
324 energy state [61,62]. Likewise, in obese adipocyte cell metabolism, the lower gene expression  
325 of fatty acid pathways because of defection in mitochondrial function resulting from a decrease  
326 in the mitochondrial acetyl-CoA concentration has already been established [13]. In this  
327 research work, iES1300 represented a significant diversity in the flux distributions of the lean  
328 and fat models, especially flux of three important reactions in cholesterol metabolism, fatty  
329 acid oxidation, and glyoxylate and dicarboxylate metabolism are significantly different. These  
330 reactions contributed to the production of mitochondrial acetyl-CoA and subsequently  
331 significant discrepancy in fatty acid oxidation metabolism was observed.

## 332 **Conclusion**

333 Chickens are the animals most associated with humans in rural life and animal husbandries,  
334 chickens are the most associated animals with humans to produce meat and egg. As a result, a  
335 metabolic model of the chicken cell will help us understand more about this organism's  
336 behavior and prevent disease outbreaks. Accordingly, to reconstruct the first genome-scale  
337 metabolic model of the chicken cell as well as the chicken biological and genomic data were

338 manually collected in the form of a draft from different available bioinformatics databases and  
339 used after performing the gap-filling process. The final model consisted of 2427 reactions,  
340 2569 metabolites, and 1300 genes. The chicken model was compared with three other  
341 important models to evaluate the interaction of metabolic gene networks. This comparison  
342 demonstrated the relative similarity of the chicken's gene network to human. After model  
343 reconstruction, the transcriptomics data of the four cell types of lean, fat, normal, and tumor  
344 were integrated using the two algorithms of GIMME and TRFBA. Finally, by implementing  
345 PCA, we concluded that PCA, in addition to properly differentiating cell types from each other,  
346 has recommended important biomarkers. These biomarkers mostly participates in different  
347 metabolic pathways such as carbohydrate metabolism, to distinguish normal cells from three  
348 other cell lines.

## 349 **Acknowledgements**

350 The authors thank Tarbiat Modares University Research and Technology Unit for supporting  
351 this study.



## 352 **References**

- 353 1. Çakir T, Khatibipour MJ. Metabolic network discovery by top-down and bottom-up  
354 approaches and paths for reconciliation. *Front Bioeng Biotechnol.* 2014;2.  
355 doi:10.3389/fbioe.2014.00062
- 356 2. Duarte NC, Becker SA, Jamshidi N, Thiele I, Mo ML, Vo TD, et al. Global  
357 reconstruction of the human metabolic network based on genomic and bibliomic data.  
358 *Proc Natl Acad Sci U S A.* 2007;104: 1777–1782. doi:10.1073/pnas.0610772104
- 359 3. Xu C, Jackson SA. Machine learning and complex biological data. 2019; 1–4.
- 360 4. Karimian E, Motamedian E. ACBM: An Integrated Agent and Constraint Based  
361 Modeling Framework for Simulation of Microbial Communities. *Sci Rep.* 2020;10: 1–  
362 10. doi:10.1038/s41598-020-65659-w
- 363 5. Bordbar A, Monk JM, King ZA, Palsson BO. Constraint-based models predict metabolic  
364 and associated cellular functions. *Nat Rev Genet.* 2014;15: 107–120.  
365 doi:10.1038/nrg3643
- 366 6. Id GZ, Id SV, Yaneske E, Id CA. Machine and deep learning meet genome- scale  
367 metabolic modeling. 2019; 1–24.
- 368 7. Monk J, Nogales J, Palsson BO. Optimizing genome-scale network reconstructions. *Nat*  
369 *Biotechnol.* 2014;32: 447–452. doi:10.1038/nbt.2870
- 370 8. Saha R, Chowdhury A, Maranas CD. Recent advances in the reconstruction of metabolic  
371 models and integration of omics data. *Curr Opin Biotechnol.* 2014;29: 39–45.  
372 doi:10.1016/j.copbio.2014.02.011
- 373 9. Oberhardt MA, Palsson B, Papin JA. Applications of genome-scale metabolic

- 374 reconstructions. *Mol Syst Biol.* 2009;5. doi:10.1038/msb.2009.77
- 375 10. Gu C, Kim GB, Kim WJ, Kim HU, Lee SY. Current status and applications of genome-  
376 scale metabolic models. *Genome Biol.* 2019;20. doi:10.1186/s13059-019-1730-3
- 377 11. Förster J, Famili I, Fu P, Palsson B, Nielsen J. Genome-scale reconstruction of the  
378 *Saccharomyces cerevisiae* metabolic network. *Genome Res.* 2003.  
379 doi:10.1101/gr.234503
- 380 12. Thiele I, Swainston N, Fleming RMT, Hoppe A, Sahoo S, Aurich MK, et al. A  
381 community-driven global reconstruction of human metabolism. *Nat Biotechnol.*  
382 2013;31: 419–425. doi:10.1038/nbt.2488
- 383 13. Mardinoglu A, Agren R, Kampf C, Asplund A, Nookaew I, Jacobson P, et al. Integration  
384 of clinical data with a genome-scale metabolic model of the human adipocyte. *Mol Syst*  
385 *Biol.* 2013;9: 10. doi:10.1038/msb.2013.5
- 386 14. Swainston N, Smallbone K, Hefzi H, Dobson PD, Brewer J, Hanscho M, et al. Recon  
387 2.2: from reconstruction to model of human metabolism. *Metabolomics.* 2016;12.  
388 doi:10.1007/s11306-016-1051-4
- 389 15. Brunk E, Sahoo S, Zielinski DC, Altunkaya A, Dräger A, Mih N, et al. Recon3D enables  
390 a three-dimensional view of gene variation in human metabolism. *Nat Biotechnol.*  
391 2018;36: 272–281. doi:10.1038/nbt.4072
- 392 16. Sheikh K, Förster J, Nielsen LK. Modeling hybridoma cell metabolism using a generic  
393 genome-scale metabolic model of *Mus musculus*. *Biotechnol Prog.* 2005.  
394 doi:10.1021/bp0498138
- 395 17. Sigurdsson MI, Jamshidi N, Steingrimsson E, Thiele I, Palsson BT. A detailed genome-  
396 wide reconstruction of mouse metabolism based on human Recon 1. *BMC Syst Biol.*

- 397 2010;4. doi:10.1186/1752-0509-4-140
- 398 18. Hefzi H, Ang KS, Hanscho M, Bordbar A, Ruckerbauer D, Lakshmanan M, et al. A  
399 Consensus Genome-scale Reconstruction of Chinese Hamster Ovary Cell Metabolism.  
400 Cell Syst. 2016;3: 434-443.e8. doi:10.1016/j.cels.2016.10.020
- 401 19. Calmels C, McCann A, Malphettes L, Andersen MR. Application of a curated genome-  
402 scale metabolic model of CHO DG44 to an industrial fed-batch process. Metab Eng.  
403 2019;51: 9–19. doi:10.1016/j.ymben.2018.09.009
- 404 20. Thornton PK. Livestock production: Recent trends, future prospects. Philos Trans R Soc  
405 B Biol Sci. 2010;365: 2853–2867. doi:10.1098/rstb.2010.0134
- 406 21. Stern CD. The chick: A great model system becomes even greater. Dev Cell. 2005;8: 9–  
407 17. doi:10.1016/S1534-5807(04)00425-3
- 408 22. Hillier LW, Miller W, Birney E, Warren W, Hardison RC, Ponting CP, et al. Sequence  
409 and comparative analysis of the chicken genome provide unique perspectives on  
410 vertebrate evolution. Nature. 2004;432: 695–716. doi:10.1038/nature03154
- 411 23. Angel R. Metabolic disorders: Limitations to growth of and mineral deposition into the  
412 broiler skeleton after hatch and potential implications for leg problems. J Appl Poult  
413 Res. 2007;16: 138–149. doi:10.1093/japr/16.1.138
- 414 24. Julian RJ. Production and growth related disorders and other metabolic diseases of  
415 poultry - A review. Vet J. 2005;169: 350–369. doi:10.1016/j.tvjl.2004.04.015
- 416 25. Orth JD, Thiele I, Palsson BO. What is flux balance analysis? Nat Biotechnol. 2010;28:  
417 245–248. doi:10.1038/nbt.1614
- 418 26. Thiele I, Palsson B. A protocol for generating a high-quality genome-scale metabolic  
419 reconstruction. Nat Protoc. 2010;5: 93–121. doi:10.1038/nprot.2009.203

- 420 27. Kanehisa M, Sato Y, Furumichi M, Morishima K, Tanabe M. New approach for  
421 understanding genome variations in KEGG. *Nucleic Acids Res.* 2019;47: D590–D595.  
422 doi:10.1093/nar/gky962
- 423 28. King ZA, Lu J, Dräger A, Miller P, Federowicz S, Lerman JA, et al. BiGG Models: A  
424 platform for integrating, standardizing and sharing genome-scale models. *Nucleic Acids*  
425 *Res.* 2016;44: D515–D522. doi:10.1093/nar/gkv1049
- 426 29. Hastings J, De Matos P, Dekker A, Ennis M, Harsha B, Kale N, et al. The ChEBI  
427 reference database and ontology for biologically relevant chemistry: Enhancements for  
428 2013. *Nucleic Acids Res.* 2013;41. doi:10.1093/nar/gks1146
- 429 30. Freudenrich CC, Murphy E, Levy LA, London RE, Lieberman M. Intracellular pH  
430 modulates cytosolic free magnesium in cultured chicken heart cells. *Am J Physiol - Cell*  
431 *Physiol.* 1992;262. doi:10.1152/ajpcell.1992.262.4.c1024
- 432 31. Bateman A. UniProt: A worldwide hub of protein knowledge. *Nucleic Acids Res.*  
433 2019;47: D506–D515. doi:10.1093/nar/gky1049
- 434 32. Yu CS, Chen YC, Lu CH, Hwang JK. Prediction of protein subcellular localization.  
435 *Proteins Struct Funct Genet.* 2006;64: 643–651. doi:10.1002/prot.21018
- 436 33. Chou KC, Shen H Bin. A new method for predicting the subcellular localization of  
437 eukaryotic proteins with both single and multiple sites: Euk-mPLoc 2.0. *PLoS One.*  
438 2010. doi:10.1371/journal.pone.0009931
- 439 34. Fabregat A, Jupe S, Matthews L, Sidiropoulos K, Gillespie M, Garapati P, et al. The  
440 Reactome Pathway Knowledgebase. *Nucleic Acids Res.* 2018;46: D649–D655.  
441 doi:10.1093/nar/gkx1132
- 442 35. Sinclair R. Response of mammalian cells to controlled growth rates in steady-state

- 443 continuous culture. *In Vitro*. 1974. doi:10.1007/BF02615311
- 444 36. Simonyan V, Chumakov K, Dingerdissen H, Faison W, Goldweber S, Golikov A, et al.  
445 High-performance Integrated Virtual Environment (HIVE): A robust infrastructure for  
446 next-generation sequence data analysis. *Database*. 2016;2016.  
447 doi:10.1093/database/baw022
- 448 37. O’Leary NA, Wright MW, Brister JR, Ciuffo S, Haddad D, McVeigh R, et al. Reference  
449 sequence (RefSeq) database at NCBI: Current status, taxonomic expansion, and  
450 functional annotation. *Nucleic Acids Res*. 2016. doi:10.1093/nar/gkv1189
- 451 38. Schellenberger J, Que R, Fleming RMT, Thiele I, Orth JD, Feist AM, et al. Quantitative  
452 prediction of cellular metabolism with constraint-based models: The COBRA Toolbox  
453 v2.0. *Nat Protoc*. 2011;6: 1290–1307. doi:10.1038/nprot.2011.308
- 454 39. Folger O, Jerby L, Frezza C, Gottlieb E, Ruppin E, Shlomi T. Predicting selective drug  
455 targets in cancer through metabolic networks. *Mol Syst Biol*. 2011;7.  
456 doi:10.1038/msb.2011.35
- 457 40. Machicao J, Filho HA, Lahr DJG, Buckeridge M, Bruno OM. Topological assessment  
458 of metabolic networks reveals evolutionary information. *Sci Rep*. 2018;8: 1–11.  
459 doi:10.1038/s41598-018-34163-7
- 460 41. Mo ML, Palsson B, Herrgård MJ. Connecting extracellular metabolomic measurements  
461 to intracellular flux states in yeast. *BMC Syst Biol*. 2009. doi:10.1186/1752-0509-3-37
- 462 42. Orth JD, Conrad TM, Na J, Lerman JA, Nam H, Feist AM, et al. A comprehensive  
463 genome-scale reconstruction of *Escherichia coli* metabolism-2011. *Mol Syst Biol*.  
464 2011;7. doi:10.1038/msb.2011.65
- 465 43. Motamedian E, Ghavami G, Sardari S. Investigation on metabolism of cisplatin resistant

- 466 ovarian cancer using a genome scale metabolic model and microarray data. *Iran J Basic*  
467 *Med Sci.* 2015;18: 267–276. doi:10.22038/ijbms.2015.4131
- 468 44. Suksaweang S, Lin CM, Jiang TX, Hughes MW, Widelitz RB, Chuong CM.  
469 Morphogenesis of chicken liver: Identification of localized growth zones and the role of  
470  $\beta$ -catenin/Wnt in size regulation. *Dev Biol.* 2004;266: 109–122.  
471 doi:10.1016/j.ydbio.2003.10.010
- 472 45. Peng M, Han J, Li L, Ma H. Suppression of fat deposition in broiler chickens by (-)-  
473 hydroxycitric acid supplementation: A proteomics perspective. *Sci Rep.* 2016;6.  
474 doi:10.1038/srep32580
- 475 46. Sun L, Lamont SJ, Cooksey AM, McCarthy F, Tudor CO, Vijay-Shanker K, et al.  
476 Transcriptome response to heat stress in a chicken hepatocellular carcinoma cell line.  
477 *Cell Stress Chaperones.* 2015;20: 939–950. doi:10.1007/s12192-015-0621-0
- 478 47. Coble DJ, Fleming D, Persia ME, Ashwell CM, Rothschild MF, Schmidt CJ, et al. RNA-  
479 seq analysis of broiler liver transcriptome reveals novel responses to high ambient  
480 temperature. *BMC Genomics.* 2014;15. doi:10.1186/1471-2164-15-1084
- 481 48. Wang HB, Li H, Wang QG, Zhang XY, Wang SZ, Wang YX, et al. Profiling of chicken  
482 adipose tissue gene expression by genome array. *BMC Genomics.* 2007;8.  
483 doi:10.1186/1471-2164-8-193
- 484 49. Kolesnikov N, Hastings E, Keays M, Melnichuk O, Tang YA, Williams E, et al.  
485 ArrayExpress update-simplifying data submissions. *Nucleic Acids Res.* 2015;43:  
486 D1113–D1116. doi:10.1093/nar/gku1057
- 487 50. Jamialahmadi O, Hashemi-Najafabadi S, Motamedian E, Romeo S, Bagheri F. A  
488 benchmark-driven approach to reconstruct metabolic networks for studying cancer

- 489 metabolism. *PLoS Comput Biol.* 2019;15. doi:10.1371/journal.pcbi.1006936
- 490 51. Motamedian E, Mohammadi M, Shojaosadati SA, Heydari M. TRFBA: An algorithm  
491 to integrate genome-scale metabolic and transcriptional regulatory networks with  
492 incorporation of expression data. *Bioinformatics.* 2017.  
493 doi:10.1093/bioinformatics/btw772
- 494 52. Becker SA, Palsson BO. Context-specific metabolic networks are consistent with  
495 experiments. *PLoS Comput Biol.* 2008;4. doi:10.1371/journal.pcbi.1000082
- 496 53. Lewis NE, Hixson KK, Conrad TM, Lerman JA, Charusanti P, Polpitiya AD, et al. Omic  
497 data from evolved *E. coli* are consistent with computed optimal growth from genome-  
498 scale models. *Mol Syst Biol.* 2010;6. doi:10.1038/msb.2010.47
- 499 54. Sun B, Karin M. Obesity, inflammation, and liver cancer. *J Hepatol.* 2012;56: 704–713.  
500 doi:10.1016/j.jhep.2011.09.020
- 501 55. Fabbrini E, Sullivan S, Klein S. Obesity and nonalcoholic fatty liver disease:  
502 Biochemical, metabolic, and clinical implications. *Hepatology.* 2010;51: 679–689.  
503 doi:10.1002/hep.23280
- 504 56. Bartke N, Hannun YA. Bioactive sphingolipids: Metabolism and function. *J Lipid Res.*  
505 2009;50. doi:10.1194/jlr.R800080-JLR200
- 506 57. Lane AN, Fan TWM. Regulation of mammalian nucleotide metabolism and  
507 biosynthesis. *Nucleic Acids Res.* 2015;43: 2466–2485. doi:10.1093/nar/gkv047
- 508 58. Font-Burgada J, Sun B, Karin M. Obesity and Cancer: The Oil that Feeds the Flame.  
509 *Cell Metab.* 2016;23: 48–62. doi:10.1016/j.cmet.2015.12.015
- 510 59. Amelio I, Cutruzzolá F, Antonov A, Agostini M, Melino G. Serine and glycine  
511 metabolism in cancer. *Trends Biochem Sci.* 2014;39: 191–198.

512           doi:10.1016/j.tibs.2014.02.004

513   60.   Villa E, Ali ES, Sahu U, Ben-Sahra I. Cancer cells tune the signaling pathways to  
514       empower de novo synthesis of nucleotides. *Cancers*. 2019.  
515       doi:10.3390/cancers11050688

516   61.   Hardie DG, Scott JW, Pan DA, Hudson ER. Management of cellular energy by the  
517       AMP-activated protein kinase system. *FEBS Lett*. 2003;546: 113–120.  
518       doi:10.1016/S0014-5793(03)00560-X

519   62.   Galgani J, Ravussin E. Energy metabolism, fuel selection and body weight regulation.  
520       *Int J Obes*. 2008;32. doi:10.1038/ijo.2008.246

521

522



## 523 **Supporting Information**

524 **S1 File. The Excel and SBML version of the reconstructed model.** In this supplementary  
525 file, a zip file containing the Excel and SBML version of the reconstructed chicken cell model  
526 is attached.

527 **S2 File. Detailed information of the model.** In this supplementary file, detailed information  
528 in the form of Excel sheets that has been mentioned in the paper including protein and DNA  
529 components coefficients, simulated growth medium, all and the main differentiated reactions  
530 from PCA results are available.

531

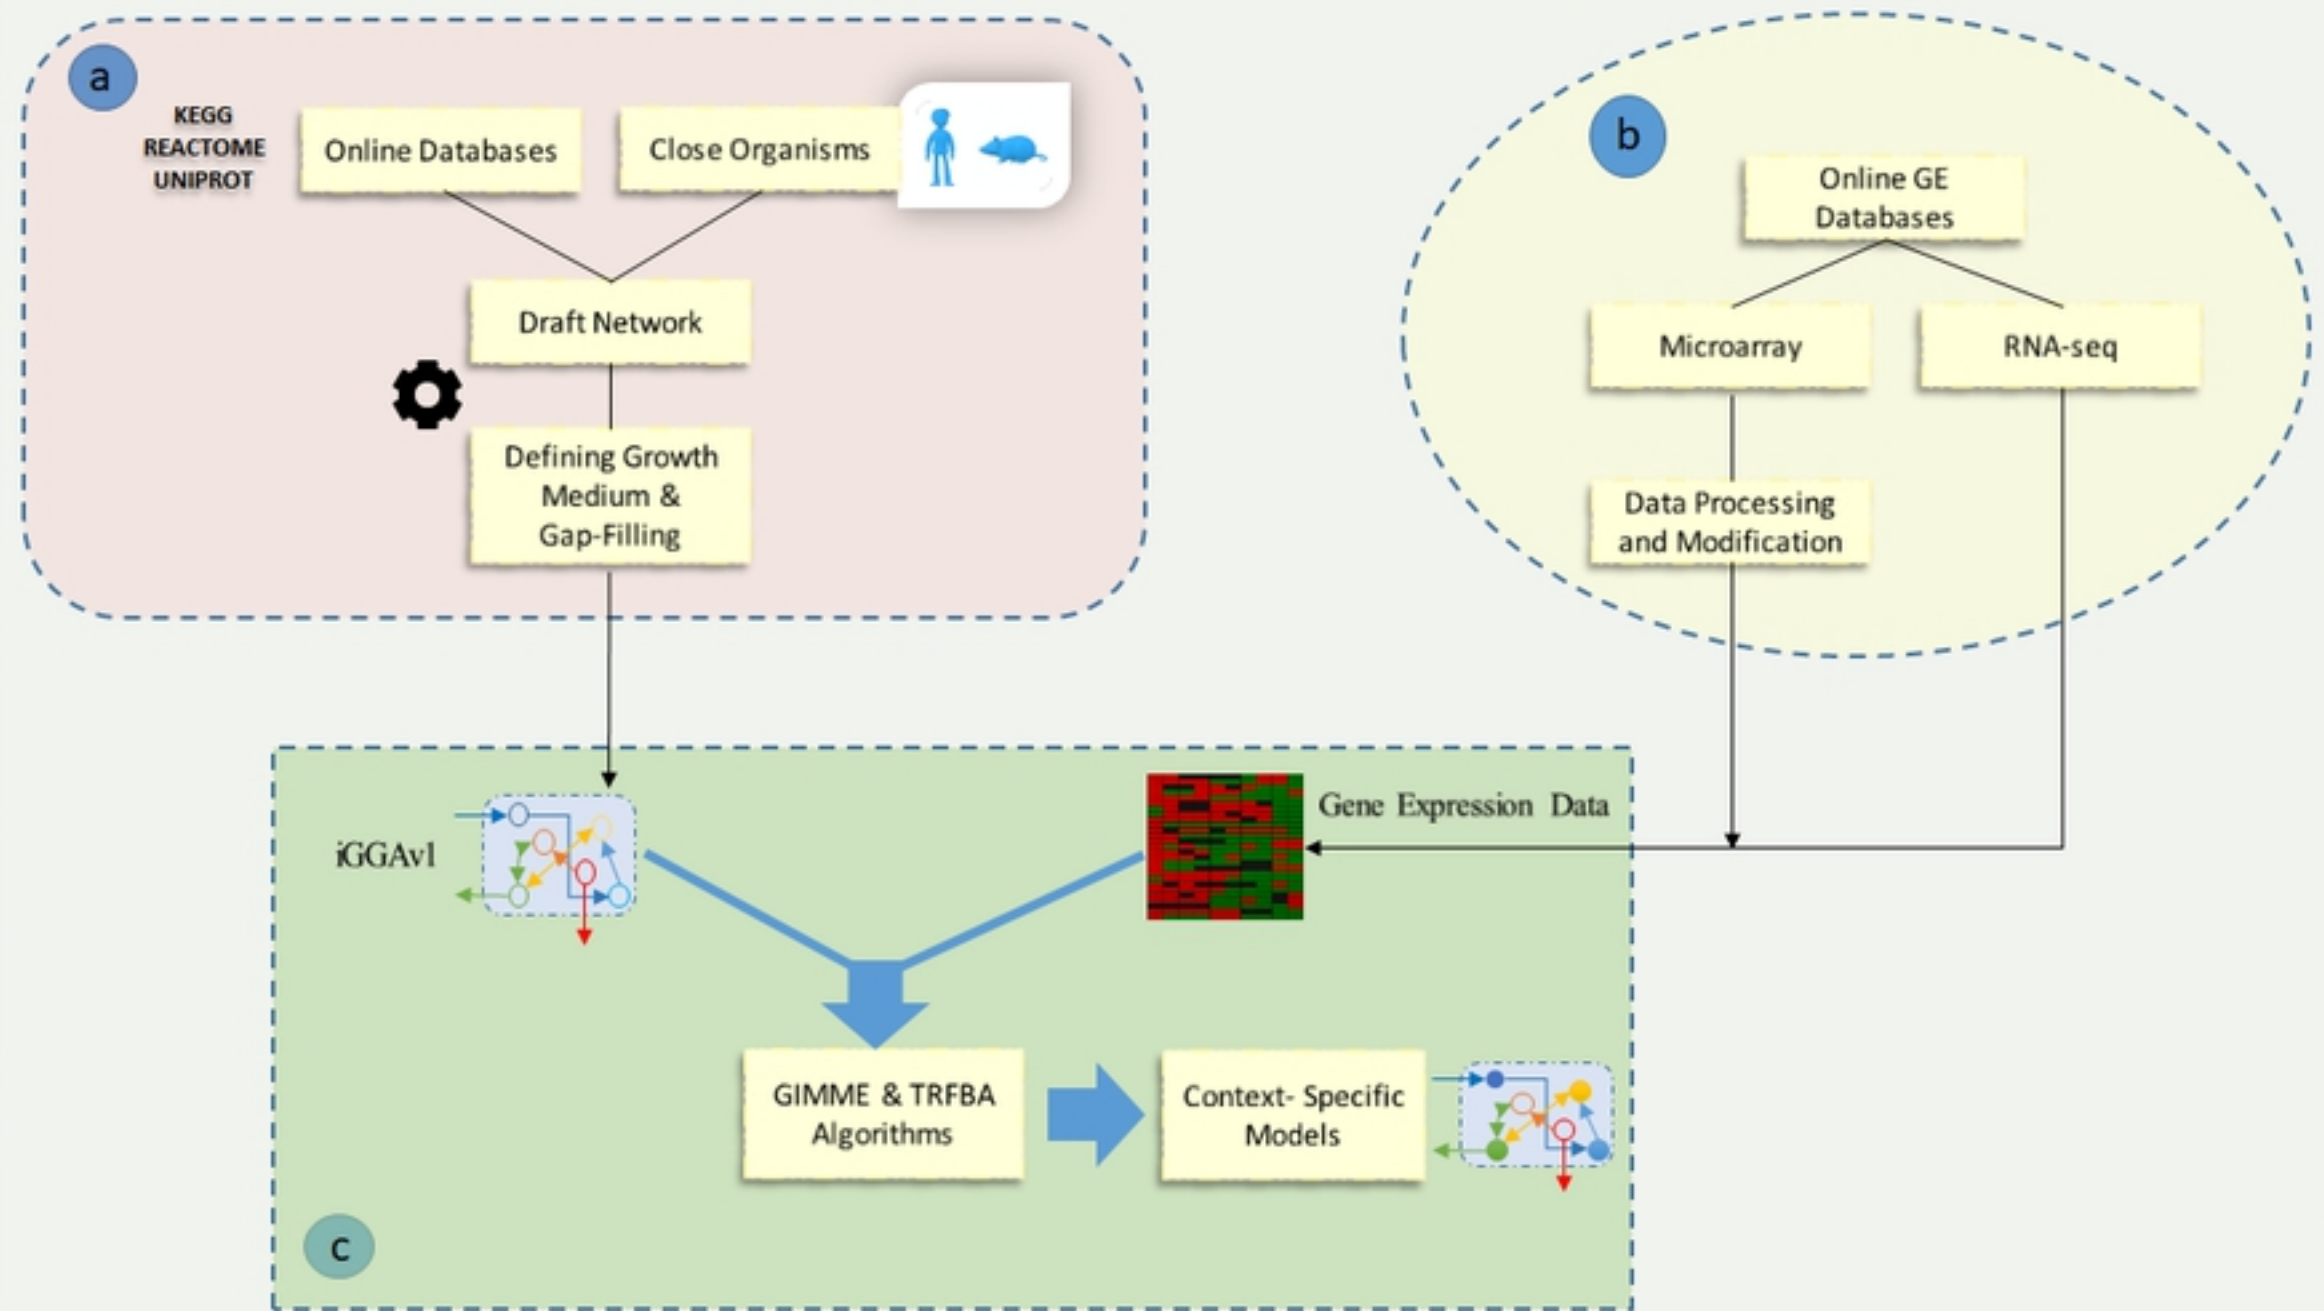

Figure 1

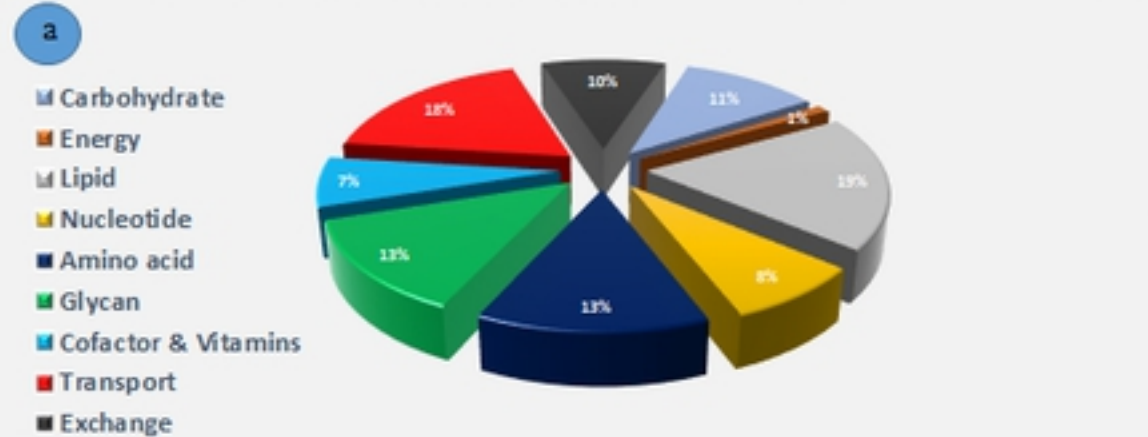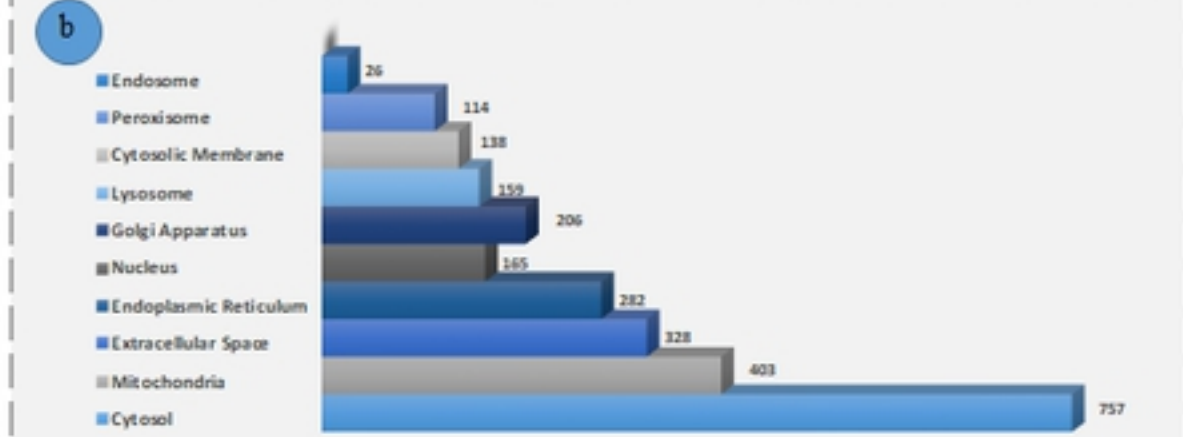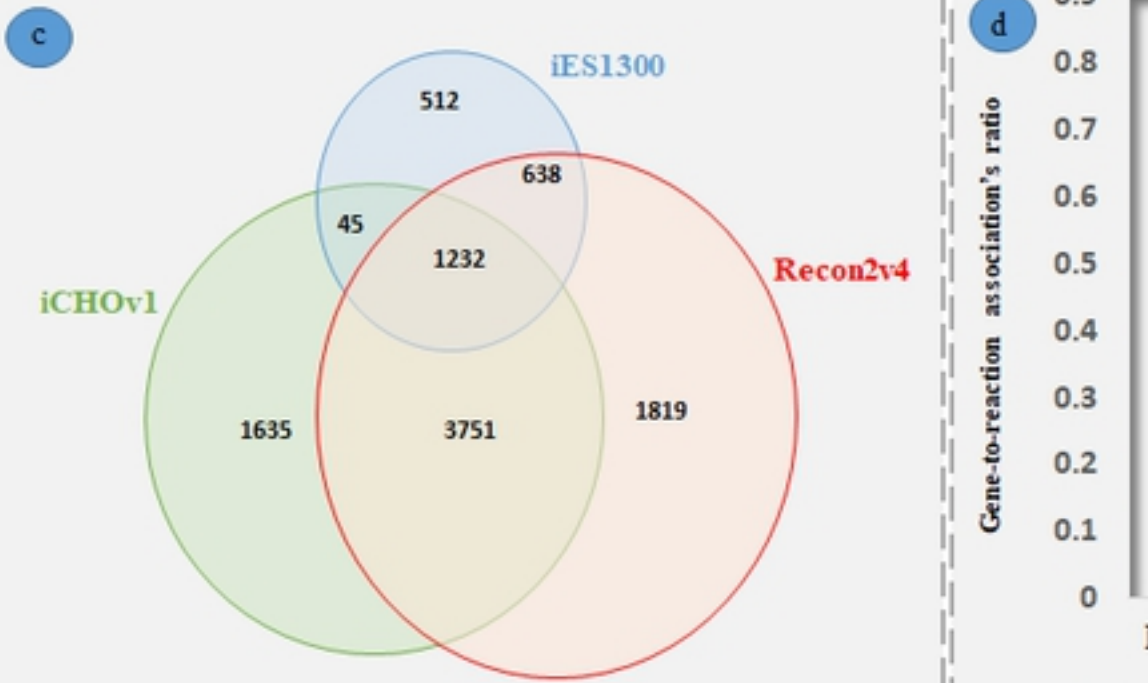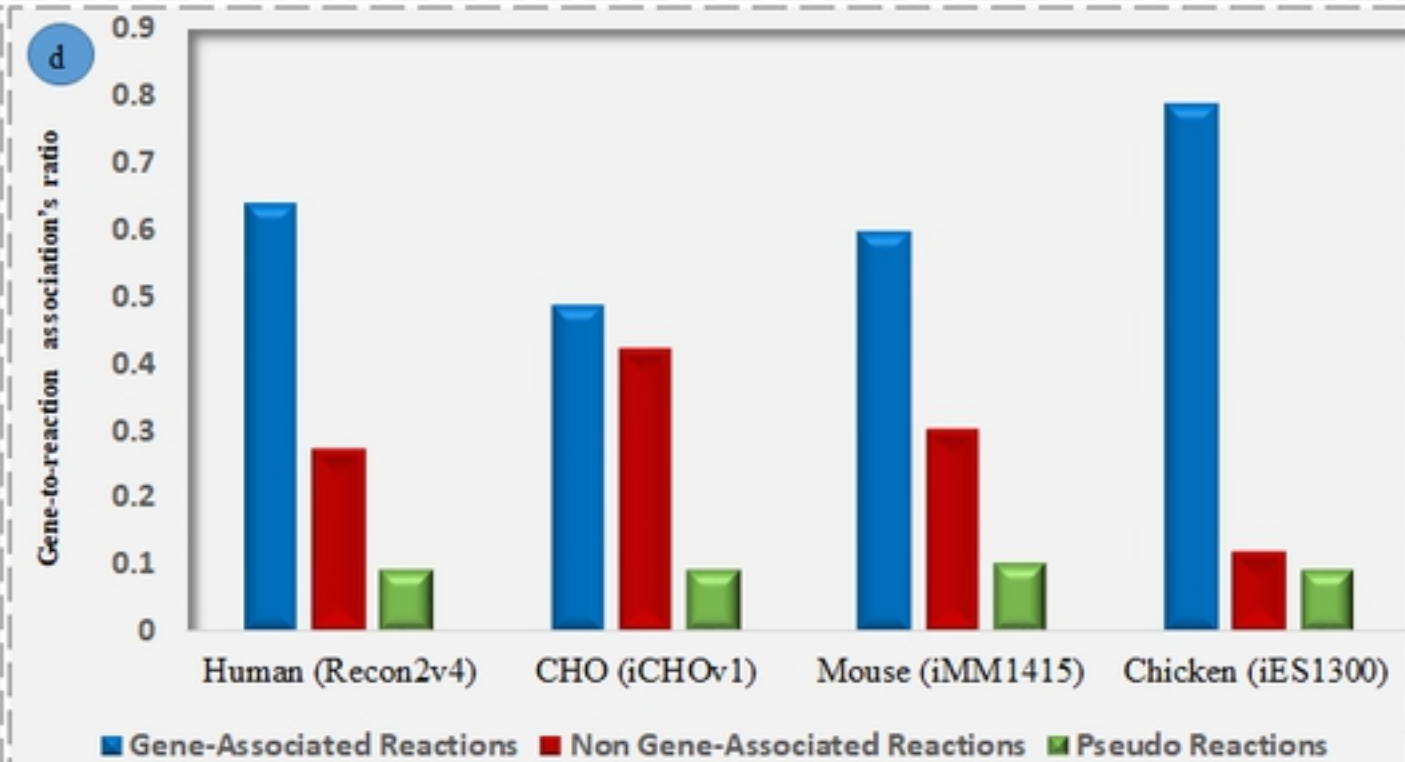

Figure 2

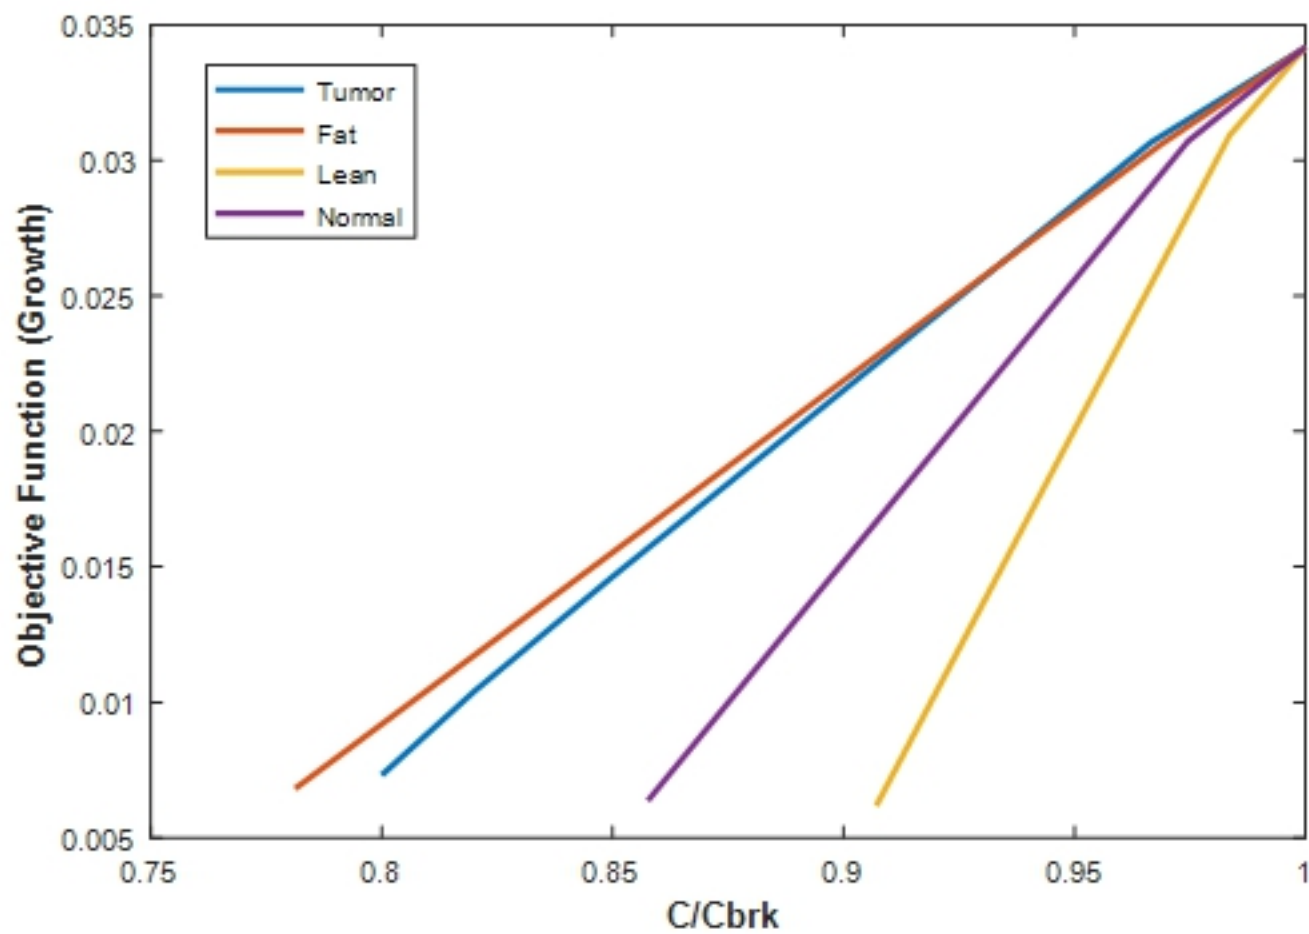

Figure 3

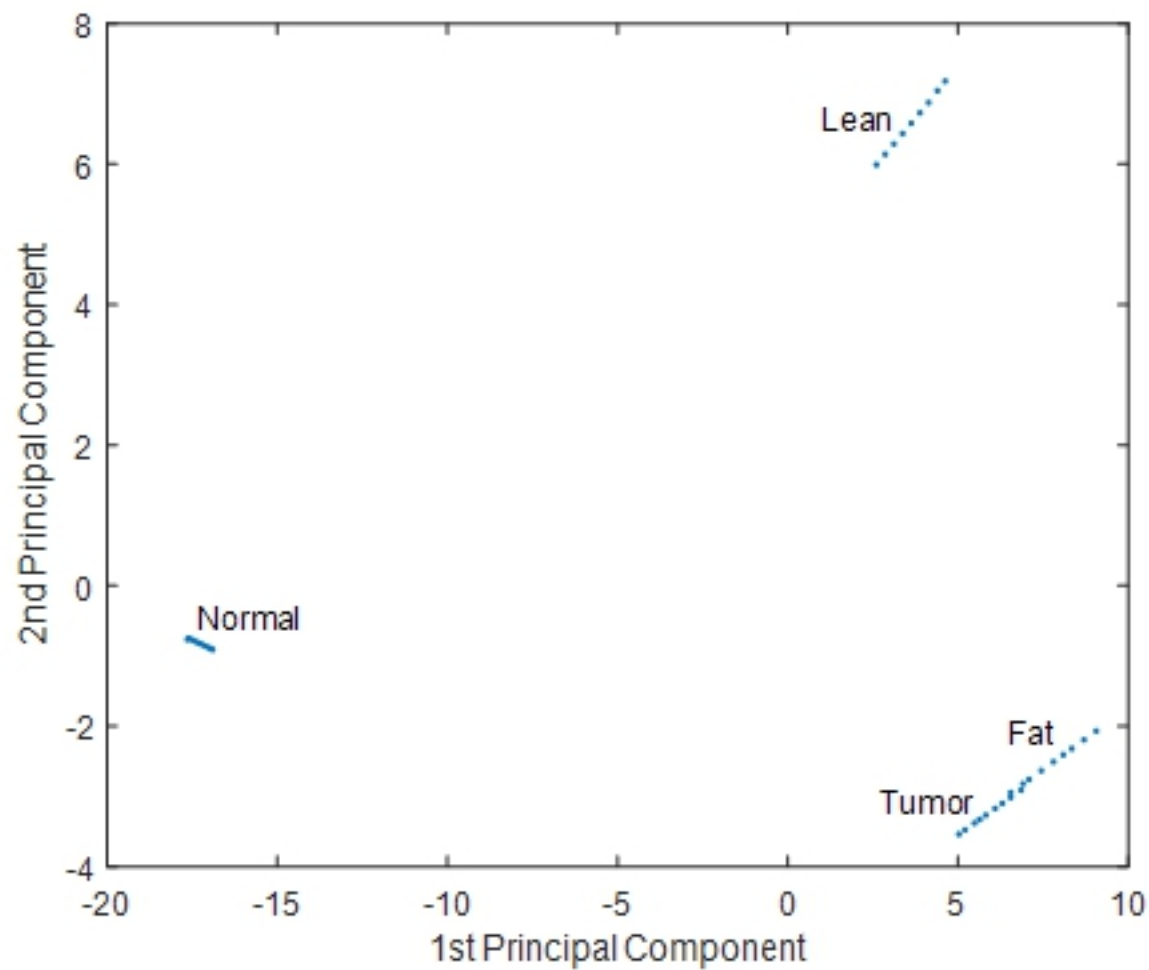

Figure 4a

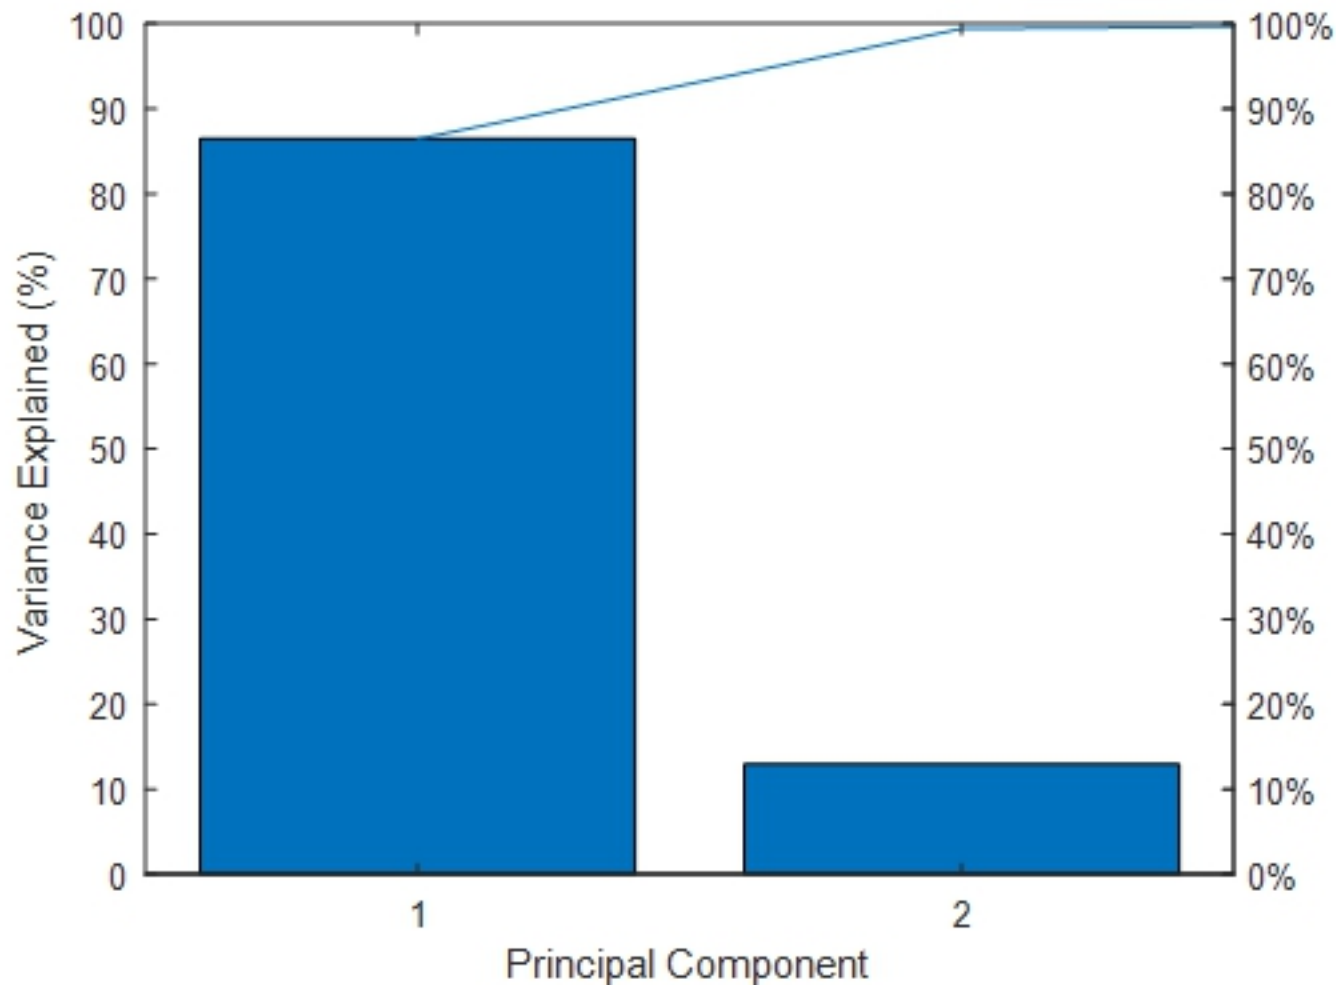

Figure 4b

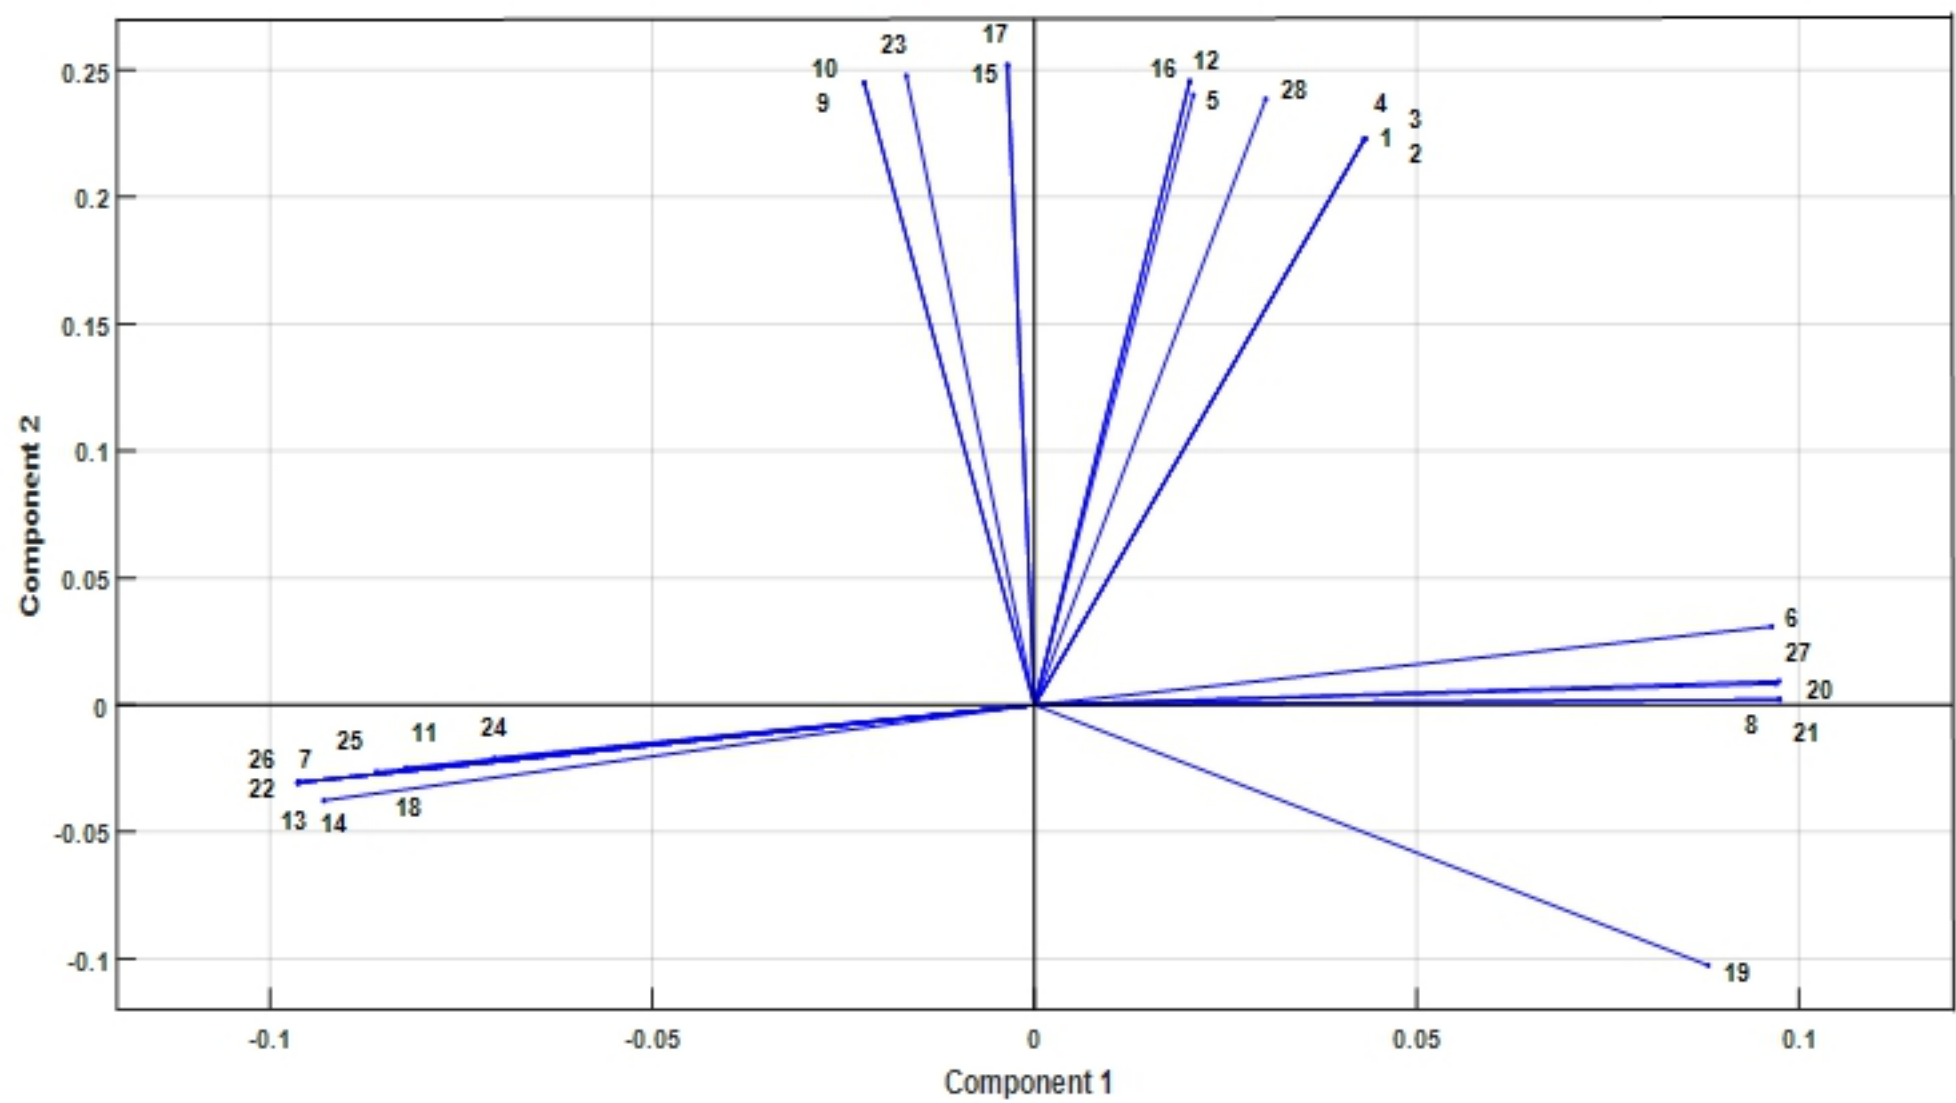

Figure 4c
